# Supplementary material for: Analysis of COVID-19 Vaccine Type and Adverse Effects Following Vaccination
Source: PubMed Central journal article supplement (PMC8696570; doi:10.1001/jamanetworkopen.2021.40364), 2021-12-22
Supplement: jamanetwopen-e2140364-s001.pdf [file jamanetwopen-e2140364-s001.pdf]

## Supplemental Online Content

Beatty AL, Peyser ND, Butcher XE, et al. Analysis of COVID-19 vaccine type and adverse effects following vaccination. *JAMA Netw Open*. 2021;4(12):e2140364. doi:10.1001/jamanetworkopen.2021.40364

**eTable 1.** Characteristics of COVID-19 Citizen Science Study Participants

**eTable 2.** Adverse Effects in Participants With Asthma by Inhaled Corticosteroid Use

**eFigure.** Free-Text Entries for Other Vaccine Adverse Effects

This supplemental material has been provided by the authors to give readers additional information about their work.

**eTable 1. Characteristics of COVID-19 Citizen Science Study Participants**

|                                                             | <b>All participants<br/>N = 65921<br/>N (%)</b> | <b>Participants active<br/>1/2021-5/2021<br/>N = 46204<br/>N (%)</b> |
|-------------------------------------------------------------|-------------------------------------------------|----------------------------------------------------------------------|
| US resident                                                 | 62743 (95.2%)                                   | 42827 (97.5%)                                                        |
| Age, median (IQR)                                           | 43.0 (34.0, 57.0)                               | 46.0 (34.0, 60.0)                                                    |
| Female sex assigned at birth                                | 44027 (68.0%)                                   | 30255 (69.4%)                                                        |
| Gender identity                                             |                                                 |                                                                      |
| Male                                                        | 20452 (31.6%)                                   | 13140 (30.2%)                                                        |
| Female                                                      | 43391 (67.0%)                                   | 29808 (68.4%)                                                        |
| Transgender Woman                                           | 89 (0.1%)                                       | 62 (0.1%)                                                            |
| Transgender Man                                             | 142 (0.2%)                                      | 101 (0.2%)                                                           |
| Genderqueer                                                 | 510 (0.8%)                                      | 354 (0.8%)                                                           |
| Other                                                       | 216 (0.3%)                                      | 159 (0.4%)                                                           |
| Race/Ethnicity                                              |                                                 |                                                                      |
| White                                                       | 56643 (88.4%)                                   | 38325 (88.7%)                                                        |
| Black or African American                                   | 1594 (2.5%)                                     | 1120 (2.6%)                                                          |
| Asian                                                       | 5319 (8.3%)                                     | 3460 (8.0%)                                                          |
| Native Hawaiian or Pacific Islander                         | 248 (0.4%)                                      | 189 (0.4%)                                                           |
| American Indian or Alaska Native                            | 984 (1.5%)                                      | 724 (1.7%)                                                           |
| Other/Don't know                                            | 2539 (4.0%)                                     | 1709 (4.0%)                                                          |
| Hispanic ethnicity (yes: PR, Mexican, Other, Cuban)         | 5512 (8.5%)                                     | 3867 (8.9%)                                                          |
| Rural ZIP code                                              | 4248 (6.8%)                                     | 3013 (7.1%)                                                          |
| Lives in ZIP in lowest quintile for median household income | 2557 (4.1%)                                     | 1656 (3.9%)                                                          |
| Subjective Social Status <sup>a</sup> , mean ± SD           | 6.8 ± 1.7                                       | 6.8 ± 1.7                                                            |
| Highest Educational Level                                   |                                                 |                                                                      |
| No high school degree                                       | 312 (0.5%)                                      | 138 (0.3%)                                                           |
| High school graduate (or equivalent)                        | 2639 (4.1%)                                     | 1481 (3.4%)                                                          |
| College degree (including associate's)                      | 34115 (52.7%)                                   | 22879 (52.5%)                                                        |
| Graduate degree                                             | 26866 (41.5%)                                   | 18568 (42.6%)                                                        |
| Other                                                       | 827 (1.3%)                                      | 492 (1.1%)                                                           |

|                                     | <b>All participants<br/>N = 65921<br/>N (%)</b> | <b>Participants active<br/>1/2021-5/2021<br/>N = 46204<br/>N (%)</b> |
|-------------------------------------|-------------------------------------------------|----------------------------------------------------------------------|
| Primary Employment                  |                                                 |                                                                      |
| Healthcare                          | 13651 (20.7%)                                   | 8943 (20.4%)                                                         |
| Education                           | 8018 (12.2%)                                    | 5225 (11.9%)                                                         |
| Retail                              | 1817 (2.8%)                                     | 967 (2.2%)                                                           |
| Transportation                      | 930 (1.4%)                                      | 555 (1.3%)                                                           |
| Arts, entertainment, and recreation | 2012 (3.1%)                                     | 1264 (2.9%)                                                          |
| Hospitality and food services       | 1415 (2.1%)                                     | 894 (2.0%)                                                           |
| Finance and insurance               | 3506 (5.3%)                                     | 2340 (5.3%)                                                          |
| Scientific and technical services   | 7022 (10.7%)                                    | 4308 (9.8%)                                                          |
| Utilities                           | 552 (0.8%)                                      | 313 (0.7%)                                                           |
| Construction                        | 985 (1.5%)                                      | 621 (1.4%)                                                           |
| Manufacturing                       | 1373 (2.1%)                                     | 930 (2.1%)                                                           |
| Other                               | 24637 (37.4%)                                   | 17553 (40.0%)                                                        |
| Working from home                   |                                                 |                                                                      |
| 100%                                | 10159 (50.7%)                                   | 6991 (49.8%)                                                         |
| >=50%                               | 3274 (16.3%)                                    | 2344 (16.7%)                                                         |
| <50%                                | 2256 (11.3%)                                    | 1643 (11.7%)                                                         |
| None                                | 4362 (21.8%)                                    | 3055 (21.8%)                                                         |
| Regular contact with 65+            | 25083 (38.1%)                                   | 17974 (40.9%)                                                        |
| Flu shot in the past year           | 50893 (77.2%)                                   | 35723 (81.4%)                                                        |
| Body Mass Index, mean ± SD          | 27.5 ± 6.7                                      | 27.5 ± 6.7                                                           |
| Medical Condition                   |                                                 |                                                                      |
| Hypertension                        | 13244 (21.0%)                                   | 9556 (22.8%)                                                         |
| Diabetes                            | 2952 (4.7%)                                     | 2152 (5.1%)                                                          |
| Coronary Artery Disease             | 1823 (2.9%)                                     | 1342 (3.2%)                                                          |
| Myocardial Infarction               | 739 (1.2%)                                      | 541 (1.3%)                                                           |
| Congestive heart failure            | 518 (0.8%)                                      | 386 (0.9%)                                                           |
| Stroke or TIA                       | 984 (1.6%)                                      | 735 (1.7%)                                                           |
| Atrial fibrillation                 | 1961 (3.1%)                                     | 1500 (3.6%)                                                          |
| Sleep apnea                         | 6650 (10.6%)                                    | 4714 (11.2%)                                                         |
| COPD                                | 1204 (1.9%)                                     | 852 (2.0%)                                                           |
| Asthma                              | 6447 (10.2%)                                    | 4249 (10.1%)                                                         |

|                                                           | <b>All participants<br/>N = 65921<br/>N (%)</b> | <b>Participants active<br/>1/2021-5/2021<br/>N = 46204<br/>N (%)</b> |
|-----------------------------------------------------------|-------------------------------------------------|----------------------------------------------------------------------|
| Immunodeficiency                                          | 1651 (2.6%)                                     | 1199 (2.9%)                                                          |
| HIV                                                       | 381 (0.6%)                                      | 284 (0.7%)                                                           |
| Anemia                                                    | 6686 (10.6%)                                    | 4634 (11.0%)                                                         |
| Pregnant (at baseline)                                    | 801 (1.3%)                                      | 576 (1.4%)                                                           |
| Current smoking                                           | 3303 (5.4%)                                     | 1815 (4.4%)                                                          |
| Current marijuana use                                     | 6335 (10.4%)                                    | 4045 (9.9%)                                                          |
| COVID-19 (at baseline or incident before date of vaccine) | 3018 (4.6%)                                     | 2575 (5.9%)                                                          |

<sup>a</sup> Subjective social status is rated 1-10, with 10 representing the highest perceived social status.  
Abbreviations: COPD = chronic obstructive pulmonary disease; HIV = human immunodeficiency virus; IQR = interquartile range; SD = standard deviation; TIA = transient ischemic attack

**eTable 2. Adverse Effects in Participants With Asthma by Inhaled Corticosteroid Use**

|                                           | All with asthma | Asthma + medication list includes inhaled corticosteroids | Asthma + medication list does not include inhaled corticosteroids | p value |
|-------------------------------------------|-----------------|-----------------------------------------------------------|-------------------------------------------------------------------|---------|
| N with at least one dose                  | 1950            | 387                                                       | 1563                                                              |         |
| Adverse effects                           |                 |                                                           |                                                                   |         |
| N with reporting adverse effects          | 1949            | 387                                                       | 1562                                                              |         |
| Fever                                     | 366 (18.8%)     | 81 (20.9%)                                                | 285 (18.2%)                                                       | 0.23    |
| Chills                                    | 503 (25.8%)     | 99 (25.6%)                                                | 404 (25.9%)                                                       | 0.91    |
| Fatigue                                   | 1066 (54.7%)    | 224 (57.9%)                                               | 842 (53.9%)                                                       | 0.16    |
| Sore/scratchy throat                      | 113 (5.8%)      | 17 (4.4%)                                                 | 96 (6.1%)                                                         | 0.19    |
| Muscle pain                               | 911 (46.7%)     | 177 (45.7%)                                               | 734 (47.0%)                                                       | 0.66    |
| Joint pain                                | 431 (22.1%)     | 89 (23.0%)                                                | 342 (21.9%)                                                       | 0.64    |
| Headache                                  | 729 (37.4%)     | 139 (35.9%)                                               | 590 (37.8%)                                                       | 0.50    |
| Other pain                                | 116 (6.0%)      | 23 (5.9%)                                                 | 93 (6.0%)                                                         | 0.99    |
| Redness/swelling at the injection site    | 419 (21.5%)     | 108 (27.9%)                                               | 311 (19.9%)                                                       | <.001   |
| Rash other than at the injection site     | 45 (2.3%)       | 10 (2.6%)                                                 | 35 (2.2%)                                                         | 0.69    |
| Allergic reaction/anaphylaxis             | 7 (0.4%)        | 1 (0.3%)                                                  | 6 (0.4%)                                                          | 0.71    |
| Other                                     | 193 (9.9%)      | 39 (10.1%)                                                | 154 (9.9%)                                                        | 0.90    |
| None of the above                         | 404 (20.7%)     | 65 (16.8%)                                                | 339 (21.7%)                                                       | 0.03    |
| Median duration of adverse effects, (IQR) | 2 (1, 3)        | 2 (1, 3)                                                  | 2 (1, 3)                                                          | 0.91    |
| Adverse effect severity                   |                 |                                                           |                                                                   |         |
| N with reporting adverse effect severity  | 1717            | 363                                                       | 1354                                                              |         |
| Very Mild                                 | 270 (15.7%)     | 59 (16.3%)                                                | 211 (15.6%)                                                       | 0.76    |
| Mild                                      | 580 (33.8%)     | 125 (34.4%)                                               | 455 (33.6%)                                                       | 0.77    |
| Moderate                                  | 570 (33.2%)     | 119 (32.8%)                                               | 451 (33.3%)                                                       | 0.85    |
| Severe                                    | 119 (6.9%)      | 19 (5.2%)                                                 | 100 (7.4%)                                                        | 0.15    |
| Very Severe                               | 7 (0.4%)        | 0                                                         | 7 (0.5%)                                                          | 0.17    |

Abbreviations: IQR- Interquartile range
